# Supplementary material
Source: Springer Nature journal article supplement (http://www.springermedizin.de/resource/supplementary/12990_2010_286_MOESM3_ESM.pdf/9612956)

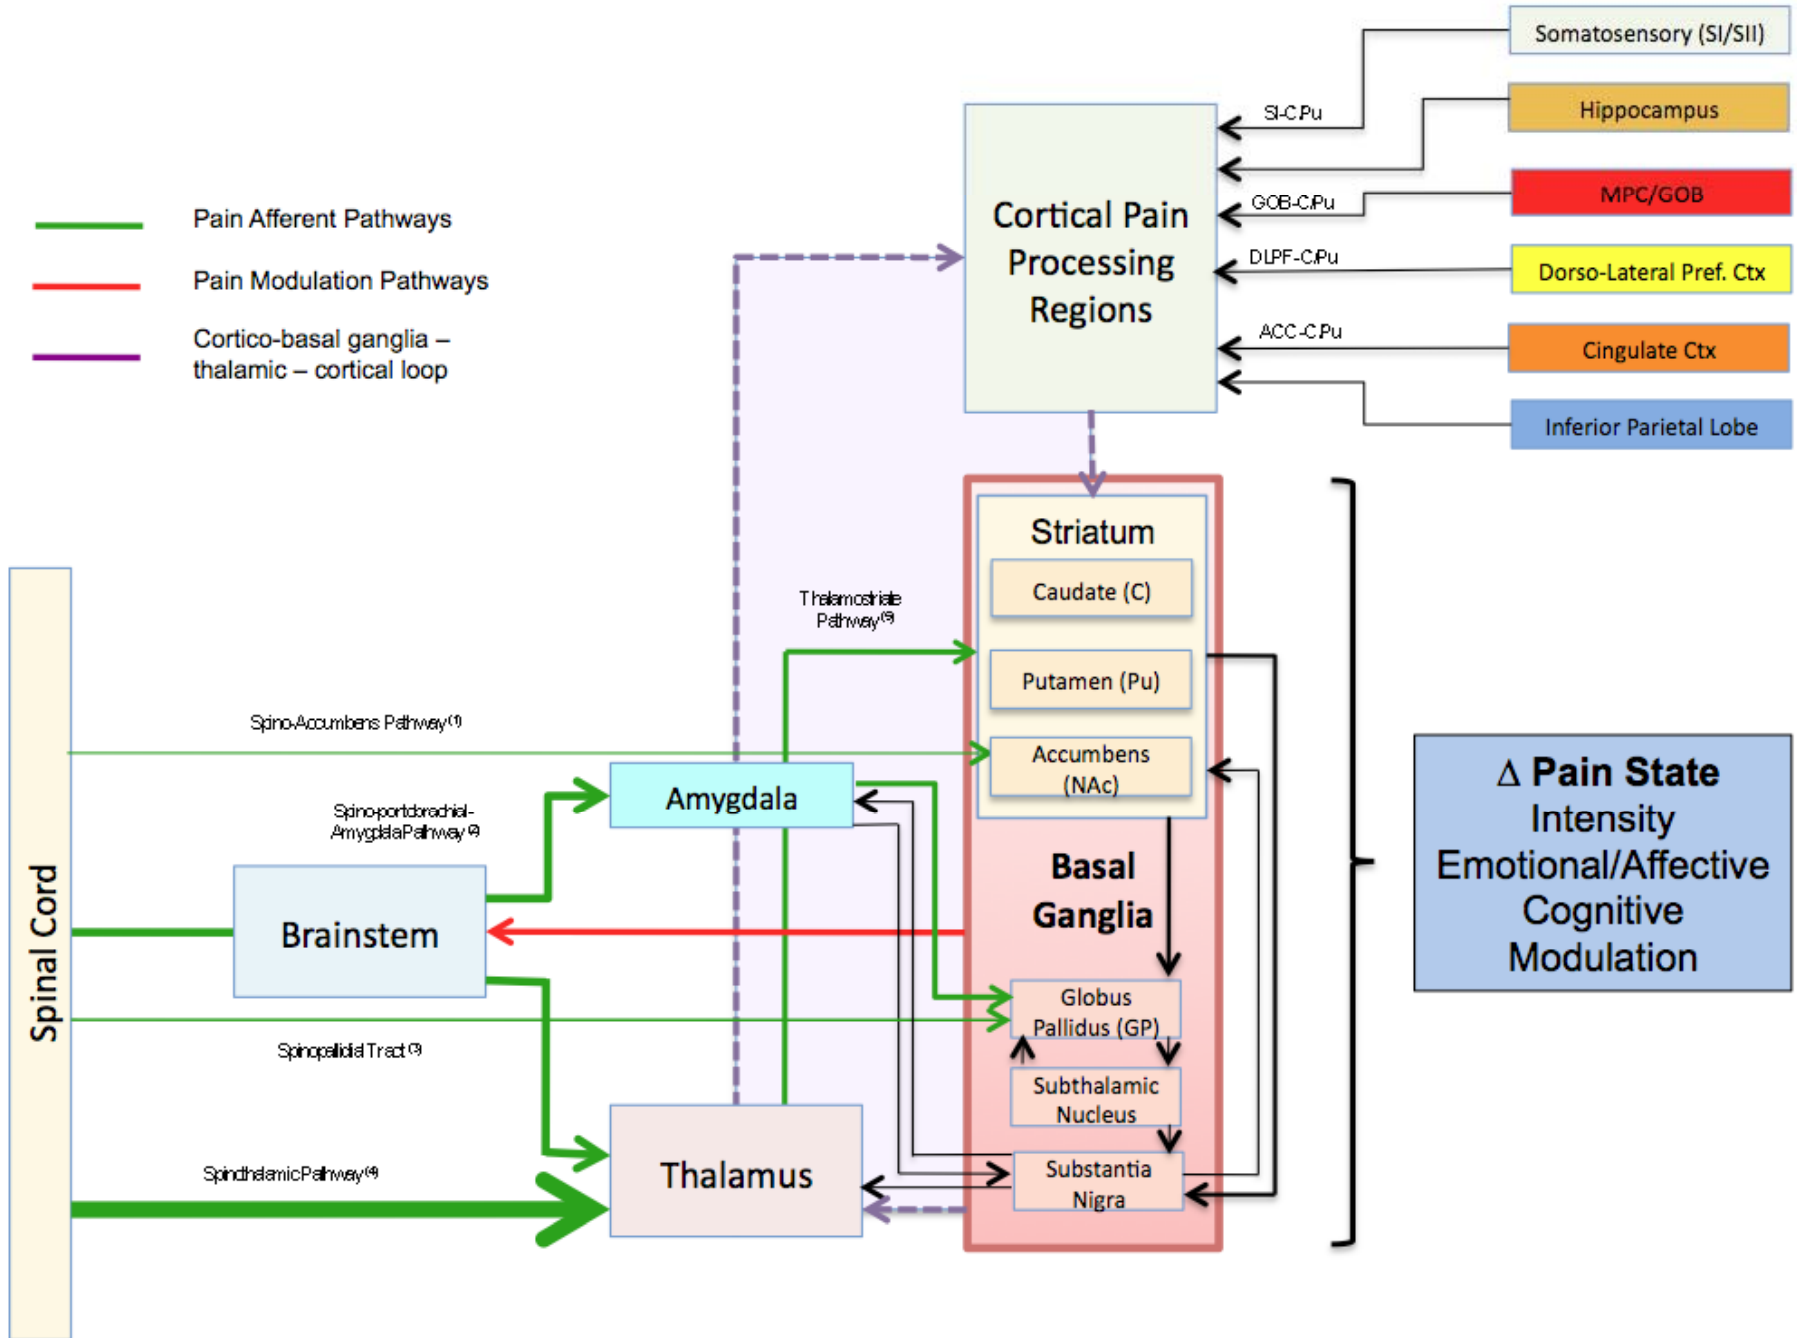

Supplement: MOESM3 [file 9612956]
